# Supplementary material for: A new crown-ether clathrate [15-crown-5][Y(NO3)2(H2O)5][NO3] with switchable dielectric constant behaviour
Source: Royal Society of Chemistry journal article supplement (doi:10.1039/d2nj03493j), 2022-01-01
Supplement: d2nj03493j1.pdf [file d2nj03493j1.pdf]

### Supporting Information

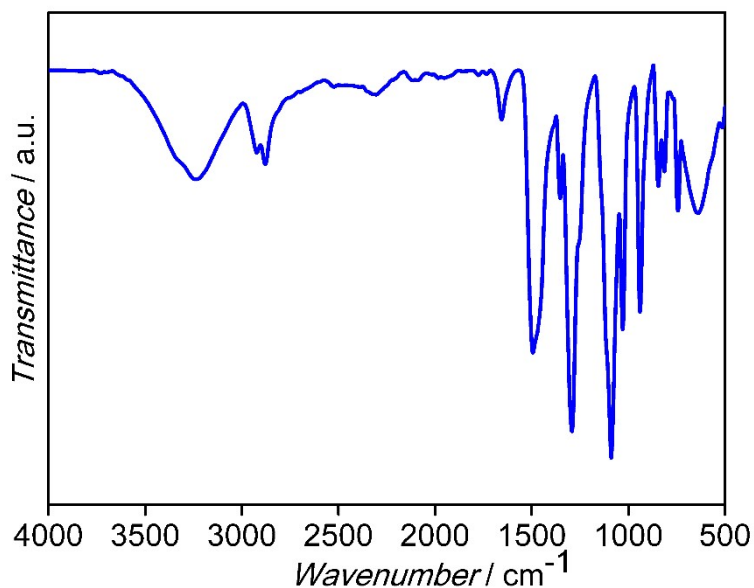

**Figure S1.** IR spectrum of **1** measured at room temperature.

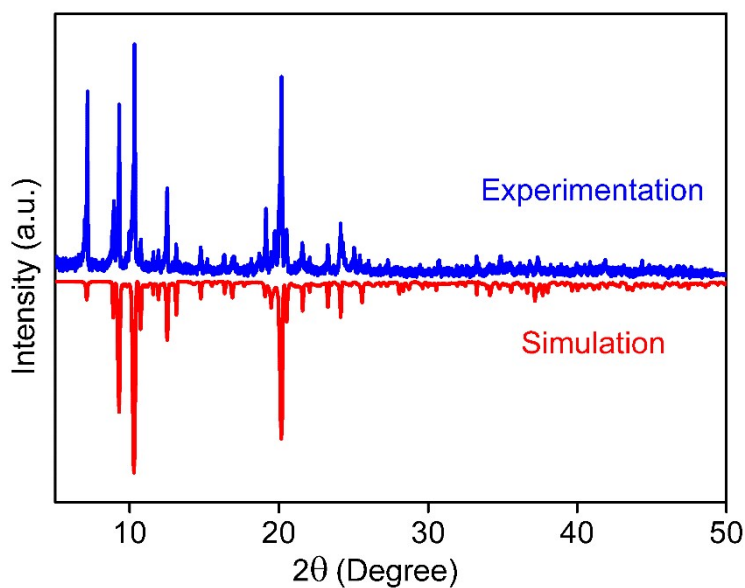

**Figure S2.** PXRD pattern **1** measured at room temperature.

**Table S1.** Hydrogen bonds for **1** at 173 K [Å and deg].

| D-H···A                                             | D-H  | H···A | D···A     | D···H-A |
|-----------------------------------------------------|------|-------|-----------|---------|
| C(12 <sup>a</sup> )-H(12A <sup>a</sup> )···O(19) #1 | 0.99 | 2.53  | 3.50(2)   | 165.6   |
| C(14)-H(14B)···O(17)                                | 0.99 | 2.58  | 3.547(15) | 129.8   |
| C(16)-H(16A)···O(19) #2                             | 0.99 | 2.56  | 3.547(15) | 176.0   |

|                                    |      |      |           |       |
|------------------------------------|------|------|-----------|-------|
| C(19)–H(19B)···O(13) #3            | 0.99 | 2.50 | 3.294(19) | 137.5 |
| O(20)–H(20C)···O(5 <sup>a</sup> )  | 0.90 | 1.93 | 2.61(2)   | 130.7 |
| O(20)–H(20C)···O(5A <sup>b</sup> ) | 0.90 | 2.30 | 2.93(2)   | 126.9 |
| O(20)–H(20D)···O(3 <sup>a</sup> )  | 0.90 | 2.14 | 2.73(3)   | 122.9 |
| O(20)–H(20D)···O(4 <sup>a</sup> )  | 0.90 | 2.16 | 3.01(3)   | 157.2 |
| O(20)–H(20D)···O(3A <sup>b</sup> ) | 0.90 | 2.58 | 3.270(18) | 134.3 |
| O(20)–H(20D)···O(4A <sup>b</sup> ) | 0.90 | 2.23 | 3.00(2)   | 143.4 |
| O(21)–H(21A)···O(11) #4            | 0.90 | 2.12 | 2.701(15) | 121.5 |
| O(21)–H(21B)···O(2 <sup>a</sup> )  | 1.00 | 2.15 | 3.11(2)   | 162.5 |
| O(21)–H(21B)···O(2A <sup>b</sup> ) | 1.00 | 1.84 | 2.818(17) | 166.5 |
| O(22)–H(22A)···O(9)                | 0.88 | 1.93 | 2.755(15) | 155.0 |
| O(22)–H(22B)···O(7)                | 0.96 | 2.03 | 2.792(13) | 135.3 |
| O(24)–H(24A)···O(4 <sup>a</sup> )  | 0.90 | 2.08 | 2.95(3)   | 1627  |
| O(24)–H(24A)···O(4A <sup>b</sup> ) | 0.90 | 1.90 | 2.786(18) | 168.2 |
| O(24)–H(24B)···O(12)               | 0.90 | 2.32 | 2.809(13) | 114.4 |
| O(24)–H(24B)···O(13)               | 0.90 | 2.64 | 3.353(15) | 137.0 |

Symmetry codes: #1  $-x+1, -y+1, -z+1$ ; #2  $-x+1, -y+2, -z+1$ ; #3  $-x+2, -y+1, -z+1$ ; #4  $x, y+1, z$ .

**Table S2.** Torsion angles [ $^{\circ}$ ] for 15-crown-5 of **1** at 173 K and 293 K.

| 173 K                    |           | 293 K                    |            |
|--------------------------|-----------|--------------------------|------------|
| O(5)–C(1)–C(2)–O(1)      | –49(3)    | C(11)–C(12)–O(6)–C(13)   | –161(9)    |
| O(1)–C(3)–C(4)–O(2)      | –18(4)    | C(12)–C(11)–O(10)–C(20)  | 127(9)     |
| O(2)–C(5)–C(6)–O(3)      | 20(4)     | C(13)–C(14)–O(7)–C(15)   | –147(6)    |
| O(3)–C(7)–C(8)–O(4)      | –22(4)    | C(14)–C(13)–O(6)–C(12)   | –169(6)    |
| O(4)–C(9)–C(10)–O(5)     | –21(4)    | C(15)–C(16)–O(8)–C(17)   | –152(5)    |
| O(6)–C(11)–C(12)–O(10)   | –64(2)    | C(16)–C(15)–O(7)–C(14)   | 158(7)     |
| O(10)–C(13)–C(14)–O(9)   | 66.1(17)  | C(17)–C(18)–O(9)–C(19)   | 154(7)     |
| O(9)–C(15)–C(16)–O(8)    | 70.1(16)  | C(18)–C(17)–O(8)–C(16)   | 150(6)     |
| O(8)–C(17)–C(18)–O(7)    | –69.9(16) | C(19)–C(20)–O(10)–C(11)  | –137(9)    |
| O(7)–C(19)–C(20)–O(6)    | –76.8(17) | C(20)–C(19)–O(9)–C(18)   | –149(6)    |
| O(5A)–C(1A)–C(2A)–O(1A)  | 71(3)     | O(6)–C(13)–C(14)–O(7)    | –32(7)     |
| O(1A)–C(3A)–C(4A)–O(2A)  | –44(3)    | O(7)–C(15)–C(16)–O(8)    | –22(8)     |
| O(2A)–C(5A)–C(6A)–O(3A)  | 80(3)     | O(8)–C(17)–C(18)–O(9)    | 24(5)      |
| O(3A)–C(7A)–C(8A)–O(4A)  | –80(3)    | O(9)–C(19)–C(20)–O(10)   | –21(8)     |
| O(4A)–C(9A)–C(10A)–O(5A) | –65(3)    | O(9)–C(18A)–C(17A)–O(8A) | –71.1(19)  |
| C(4)–C(3)–O(1)–C(2)      | –132(3)   | O(10)–C(11)–C(12)–O(6)   | 32(6)      |
| C(1)–C(2)–O(1)–C(3)      | –176(2)   | O(14)–N(3)–O(15)–Y(1)    | 4.7(15)    |
| C(6)–C(5)–O(2)–C(4)      | –140(2)   | O(15)–N(3)–O(14)–Y(1)    | –4.9(16)   |
| C(3)–C(4)–O(2)–C(5)      | 145(2)    | O(16)–N(3)–O(14)–Y(1)    | –179.5(13) |
| C(5)–C(6)–O(3)–C(7)      | 156(2)    | O(16)–N(3)–O(15)–Y(1)    | 179.4(13)  |
| C(8)–C(7)–O(3)–C(6)      | –159(3)   | O(17)–N(2)–O(19)–Y(1)    | –6.9(17)   |
| C(10)–C(9)–O(4)–C(8)     | –118(3)   | O(18)–N(2)–O(17)–Y(1)    | –178.8(17) |

|                          |            |                             |            |
|--------------------------|------------|-----------------------------|------------|
| C(7)–C(8)–O(4)–C(9)      | 152(3)     | O(18)–N(2)–O(19)–Y(1)       | 179(2)     |
| C(2)–C(1)–O(5)–C(10)     | –116(3)    | O(19)–N(2)–O(17)–Y(1)       | 6.6(16)    |
| C(9)–C(10)–O(5)–C(1)     | 166(2)     | C(1)–C(2)–O(1)–C(3)         | –165(2)    |
| C(1A)–C(2A)–O(1A)–C(3A)  | 150(3)     | C(2)–C(1)–O(5)–C(10)        | –124(3)    |
| C(4A)–C(3A)–O(1A)–C(2A)  | –140(3)    | C(3)–C(4)–O(2)–C(5)         | 123(4)     |
| C(6A)–C(5A)–O(2A)–C(4A)  | –162(2)    | C(4)–C(3)–O(1)–C(2)         | –141(3)    |
| C(3A)–C(4A)–O(2A)–C(5A)  | 133(2)     | C(5)–C(6)–O(3)–C(7)         | –174(3)    |
| C(5A)–C(6A)–O(3A)–C(7A)  | –171.9(19) | C(6)–C(5)–O(2)–C(4)         | –152(3)    |
| C(8A)–C(7A)–O(3A)–C(6A)  | 180(2)     | C(7)–C(8)–O(4)–C(9)         | 147(2)     |
| C(10A)–C(9A)–O(4A)–C(8A) | –72(3)     | C(8)–C(7)–O(3)–C(6)         | 179(3)     |
| C(7A)–C(8A)–O(4A)–C(9A)  | 156(2)     | C(9)–C(10)–O(5)–C(1)        | 167(3)     |
| C(2A)–C(1A)–O(5A)–C(10A) | –169(2)    | C(10)–C(9)–O(4)–C(8)        | –123(3)    |
| C(9A)–C(10A)–O(5A)–C(1A) | 155(2)     | O(1)–C(3)–C(4)–O(2)         | 7(5)       |
|                          |            | O(2)–C(5)–C(6)–O(3)         | 37(4)      |
|                          |            | O(3)–C(7)–C(8)–O(4)         | –38(4)     |
|                          |            | O(4)–C(9)–C(10)–O(5)        | –19(4)     |
|                          |            | O(5)–C(1)–C(2)–O(1)         | –48(3)     |
|                          |            | C(1A)–C(2A)–O(1A)–C(3A)     | 176(4)     |
|                          |            | C(2A)–C(1A)–O(5A)–C(10A)    | 172(4)     |
|                          |            | C(3A)–C(4A)–O(2A)–C(5A)     | 152(4)     |
|                          |            | C(4A)–C(3A)–O(1A)–C(2A)     | –105(7)    |
|                          |            | C(5A)–C(6A)–O(3A)–C(7A)     | 176(4)     |
|                          |            | C(6A)–C(5A)–O(2A)–C(4A)     | –92(5)     |
|                          |            | C(7A)–C(8A)–O(4A)–C(9A)     | 53(5)      |
|                          |            | C(8A)–C(7A)–O(3A)–C(6A)     | –152(4)    |
|                          |            | C(9A)–C(10A)–O(5A)–C(1A)    | –163(4)    |
|                          |            | C(10A)–C(9A)–O(4A)–C(8A)    | –152(4)    |
|                          |            | O(1A)–C(3A)–C(4A)–O(2A)     | –46(7)     |
|                          |            | O(2A)–C(5A)–C(6A)–O(3A)     | –94(5)     |
|                          |            | O(3A)–C(7A)–C(8A)–O(4A)     | 90(5)      |
|                          |            | O(4A)–C(9A)–C(10A)–O(5A)    | 87(6)      |
|                          |            | O(5A)–C(1A)–C(2A)–O(1A)     | –78(7)     |
|                          |            | C(11A)–C(12A)–O(6A)–C(13A)  | –164.2(17) |
|                          |            | C(11A)–O(10A)–C(20A)–C(19A) | –164.4(15) |
|                          |            | C(12A)–C(11A)–O(10A)–C(20A) | 84(2)      |
|                          |            | C(12A)–O(6A)–C(13A)–C(14A)  | 168(2)     |
|                          |            | O(10A)–C(11A)–C(12A)–O(6A)  | 71(2)      |
|                          |            | O(10A)–C(20A)–C(19A)–O(9)   | 68(2)      |
|                          |            | O(6A)–C(13A)–C(14A)–O(7A)   | –55(3)     |
|                          |            | C(13A)–C(14A)–O(7A)–C(15A)  | –96(2)     |
|                          |            | C(19A)–O(9)–C(18A)–C(17A)   | 171.3(13)  |
|                          |            | C(14A)–O(7A)–C(15A)–C(16A)  | –178.6(17) |
|                          |            | O(7A)–C(15A)–C(16A)–O(8A)   | –78(2)     |
|                          |            | C(18A)–O(9)–C(19A)–C(20A)   | –169.4(13) |

|                            |           |
|----------------------------|-----------|
| C(18A)–C(17A)–O(8A)–C(16A) | 170.6(14) |
| C(15A)–C(16A)–O(8A)–C(17A) | –83(2)    |

**Table S3.** Selected bond lengths [Å] and angles [°] for **1** (173 K, 293 K).

| <b>1</b> –173 K |            |                  |          |
|-----------------|------------|------------------|----------|
| Y1–O14          | 2.416 (11) | O23–Y1–O22       | 73.5 (3) |
| Y1–O16          | 2.442 (10) | O20–Y1–O21       | 76.0 (3) |
| Y1–O17          | 2.436 (10) | O22–Y1–O21       | 78.3 (3) |
| Y1–O18          | 2.506 (10) | O23–Y1–O24       | 69.3 (3) |
| Y1–O20          | 2.337 (8)  | O20–Y1–O24       | 71.5 (3) |
| Y1–O21          | 2.366 (8)  | O23–Y1–O14       | 75.8 (4) |
| Y1–O22          | 2.357 (8)  | O20–Y1–O14       | 80.4 (4) |
| Y1–O23          | 2.325 (8)  | O22–Y1–O14       | 94.5 (4) |
| Y1–O24          | 2.372 (8)  | O24–Y1–O14       | 78.7 (4) |
|                 |            | O23–Y1–O17       | 75.0 (3) |
|                 |            | O22–Y1–O17       | 71.8 (3) |
|                 |            | O21–Y1–O17       | 78.9 (3) |
|                 |            | O24–Y1–O17       | 96.3 (4) |
|                 |            | O20–Y1–O16       | 76.6 (4) |
|                 |            | O22–Y1–O16       | 72.8 (4) |
|                 |            | O21–Y1–O16       | 75.2 (3) |
|                 |            | O14–Y1–O16       | 51.2 (3) |
|                 |            | O20–Y1–O18       | 75.4 (4) |
|                 |            | O21–Y1–O18       | 69.8 (4) |
|                 |            | O24–Y1–O18       | 72.9 (4) |
|                 |            | O17–Y1–O18       | 51.2 (3) |
| <b>1</b> –293 K |            |                  |          |
| Y1–O14          | 2.453 (12) | O(14)–Y(1)–O(15) | 50.4(4)  |
| Y1–O15          | 2.547 (13) | O(17)–Y(1)–O(14) | 140.9(4) |
| Y1–O17          | 2.419 (12) | O(17)–Y(1)–O(15) | 140.1(4) |
| Y1–O19          | 2.367 (13) | O(19)–Y(1)–O(14) | 148.8(5) |
| Y1–O20          | 2.350 (9)  | O(19)–Y(1)–O(15) | 147.4(5) |
| Y1–O21          | 2.369 (10) | O(19)–Y(1)–O(17) | 51.7(4)  |
| Y1–O22          | 2.321 (10) | O(19)–Y(1)–O(21) | 127.4(4) |
| Y1–O23          | 2.411 (11) | O(19)–Y(1)–O(23) | 76.8(5)  |
| Y1–O24          | 2.338 (10) | O(20)–Y(1)–O(14) | 72.2(4)  |
|                 |            | O(20)–Y(1)–O(15) | 117.6(4) |
|                 |            | O(20)–Y(1)–O(17) | 73.4(4)  |
|                 |            | O(20)–Y(1)–O(19) | 94.4(5)  |
|                 |            | O(20)–Y(1)–O(21) | 77.6(4)  |
|                 |            | O(20)–Y(1)–O(23) | 142.8(4) |
|                 |            | O(21)–Y(1)–O(14) | 78.3(4)  |

---

|                  |          |
|------------------|----------|
| O(21)-Y(1)-O(15) | 69.6(4)  |
| O(21)-Y(1)-O(17) | 76.6(4)  |
| O(21)-Y(1)-O(23) | 136.2(4) |
| O(22)-Y(1)-O(14) | 123.3(5) |
| O(22)-Y(1)-O(15) | 73.2(5)  |
| O(22)-Y(1)-O(17) | 78.8(4)  |
| O(22)-Y(1)-O(19) | 83.8(5)  |
| O(22)-Y(1)-O(20) | 145.5(4) |
| O(22)-Y(1)-O(21) | 76.4(4)  |
| O(22)-Y(1)-O(23) | 70.4(4)  |
| O(22)-Y(1)-O(24) | 137.7(4) |
| O(23)-Y(1)-O(14) | 96.7(4)  |
| O(23)-Y(1)-O(15) | 74.0(5)  |
| O(23)-Y(1)-O(17) | 122.1(4) |
| O(24)-Y(1)-O(14) | 73.3(4)  |
| O(24)-Y(1)-O(15) | 106.0(4) |
| O(24)-Y(1)-O(17) | 113.8(5) |
| O(24)-Y(1)-O(19) | 75.9(5)  |
| O(24)-Y(1)-O(20) | 73.8(4)  |
| O(24)-Y(1)-O(21) | 144.5(4) |
| O(24)-Y(1)-O(23) | 69.0(4)  |

---
